# Supplementary material for: Effects of early life exposure to ultraviolet C radiation on mitochondrial DNA content, transcription, ATP production, and oxygen consumption in developing Caenorhabditis elegans
Source: PubMed Central journal article supplement (PMC3621653; doi:10.1186/2050-6511-14-9), 2013-02-04
Supplement: 2050-6511-14-9-S1.pdf [file 2050-6511-14-9-S1.pdf]

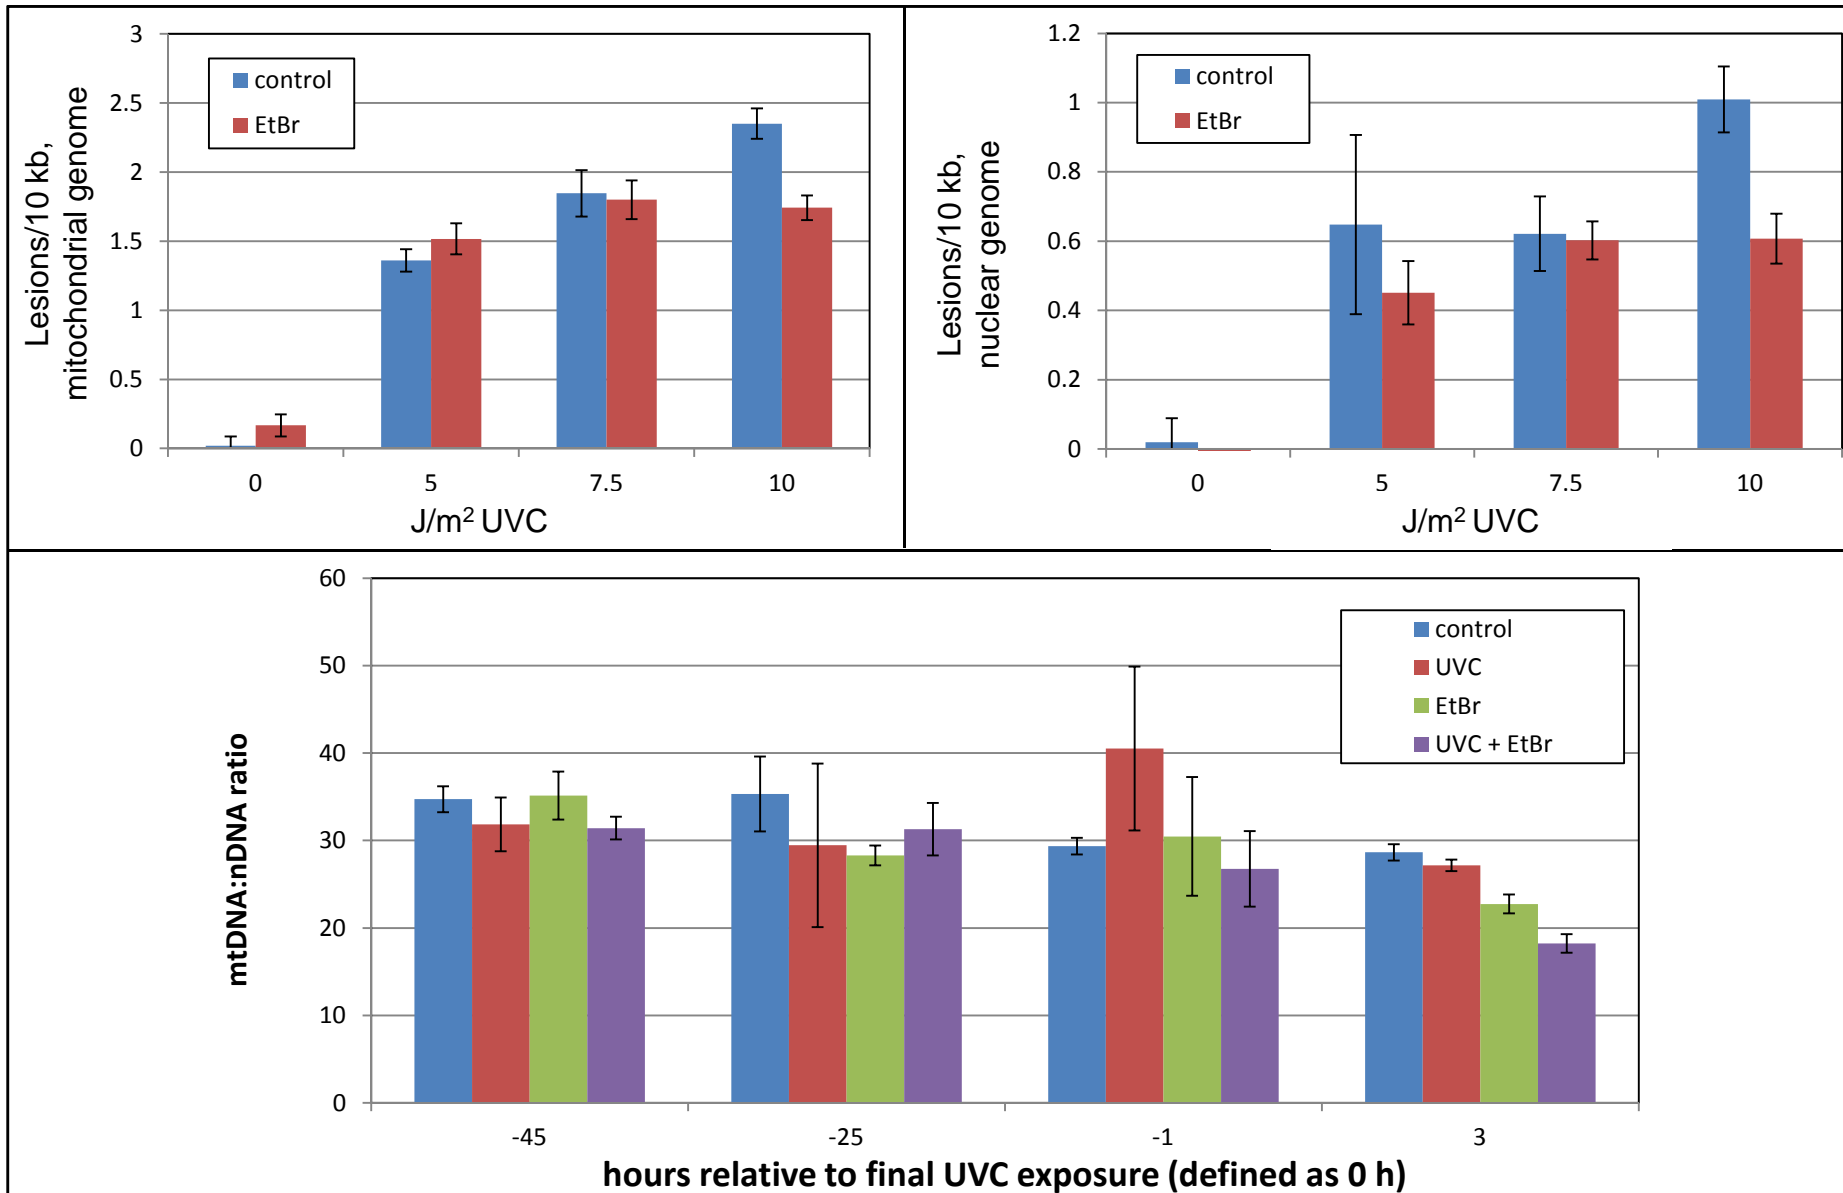

Additional Figure 2. Exposure to EtBr (5  $\mu\text{g}/\text{mL}$ ) did not result in measurable DNA damage (measured 1 h after the third UVC exposure) in either genome, nor did it exacerbate UVC-induced DNA damage in either genome ( $p > 0.05$  for main effect of EtBr and interaction term, 2 factor ANOVA). The exposures did not result in a marked change in mtDNA:nDNA ratio (bottom panel); time ( $p = 0.50$ ), treatment ( $p = 0.91$ ) and the interaction term ( $p = 0.89$ ) were all statistically insignificant. Therefore, we could not make direct within-time comparisons by FPLSD.  $n = 4\text{-}8$  per bar.

### Test Description

Selected Test : 3way ANOVA  
 p-value computation: Asymptotic  
 Multiple Testing Correction: Benjamini-Hochberg

### Result Summary

|                                  | P all | P < 0.05 | P < 0.01 | P < 0.0010 |
|----------------------------------|-------|----------|----------|------------|
| Corrected p-value(time)          | 22625 | 14970    | 12542    | 10095      |
| Corrected p-value(time-EtBr)     | 22625 | 211      | 12       | 3          |
| Corrected p-value(time-EtBr-UVC) | 22625 | 0        | 0        | 0          |
| Corrected p-value(time-UVC)      | 22625 | 23       | 11       | 6          |
| Corrected p-value(EtBr)          | 22625 | 6929     | 4095     | 1447       |
| Corrected p-value(EtBr-UVC)      | 22625 | 0        | 0        | 0          |
| Corrected p-value(UVC)           | 22625 | 140      | 77       | 36         |
| Expected by chance               |       | 748      | 125      | 10         |

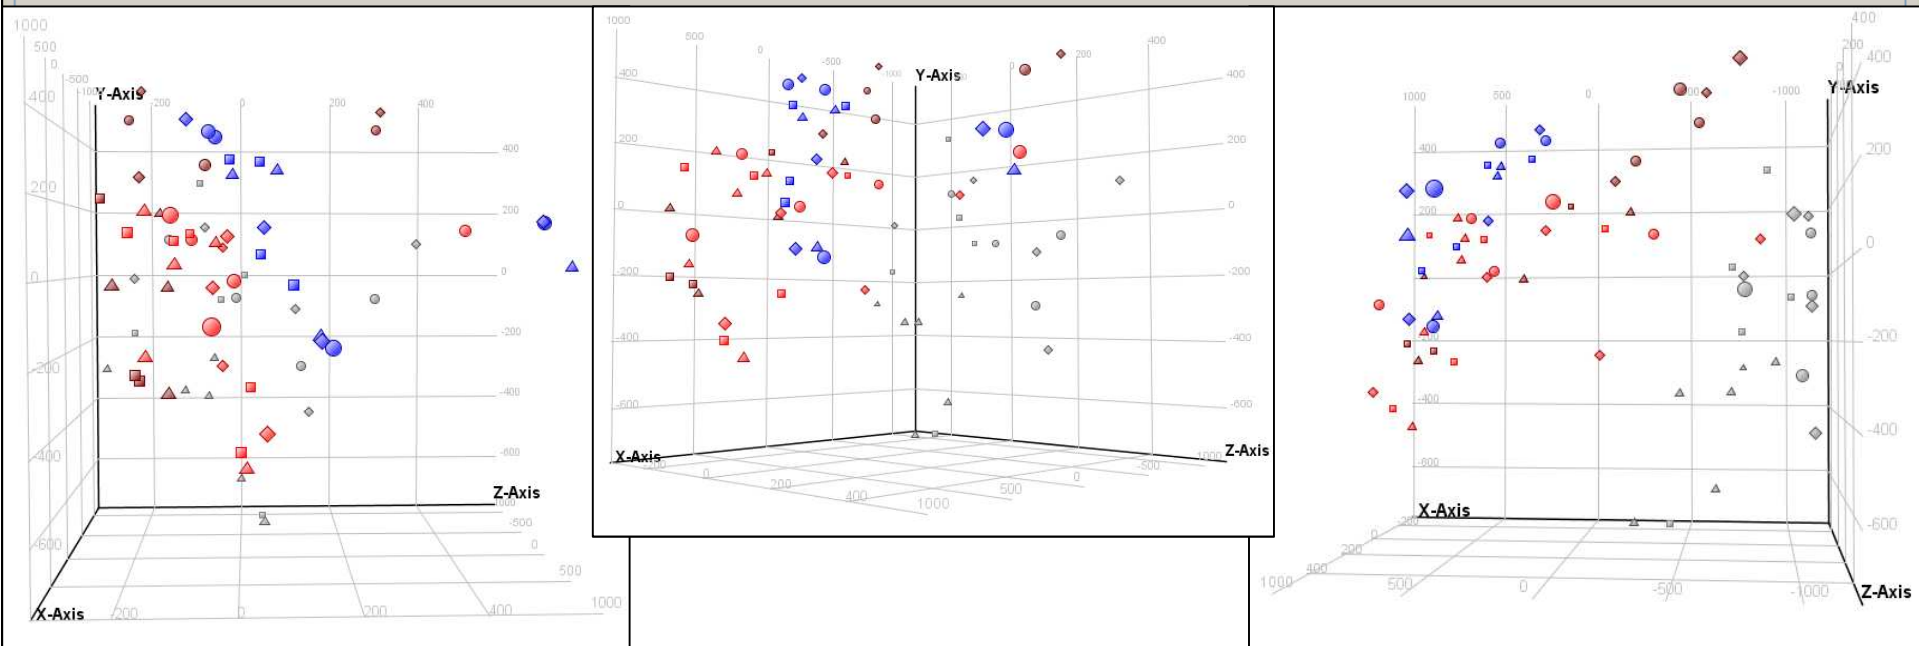

Additional Figure 3. Time and EtBr were the major drivers of differential gene expression by ANOVA and PCA. Even at the least stringent p-value, where 748 differentially expressed genes are expected to be identified by chance, no genes were differentially regulated in response to UVC in a way that was modulated by EtBr or EtBr and time. In the PCA (three views of same plot), the x-axis (component 1) explains 52% of variability, the y-axis 21%, and the z-axis 14%. Blue indicates -45 h, red -25 h, maroon -1 h, and grey 3 h. Diamonds indicate control samples, circles UVC, squares EtBr, and triangles UVC + EtBr. Analyses performed with GeneSpring.

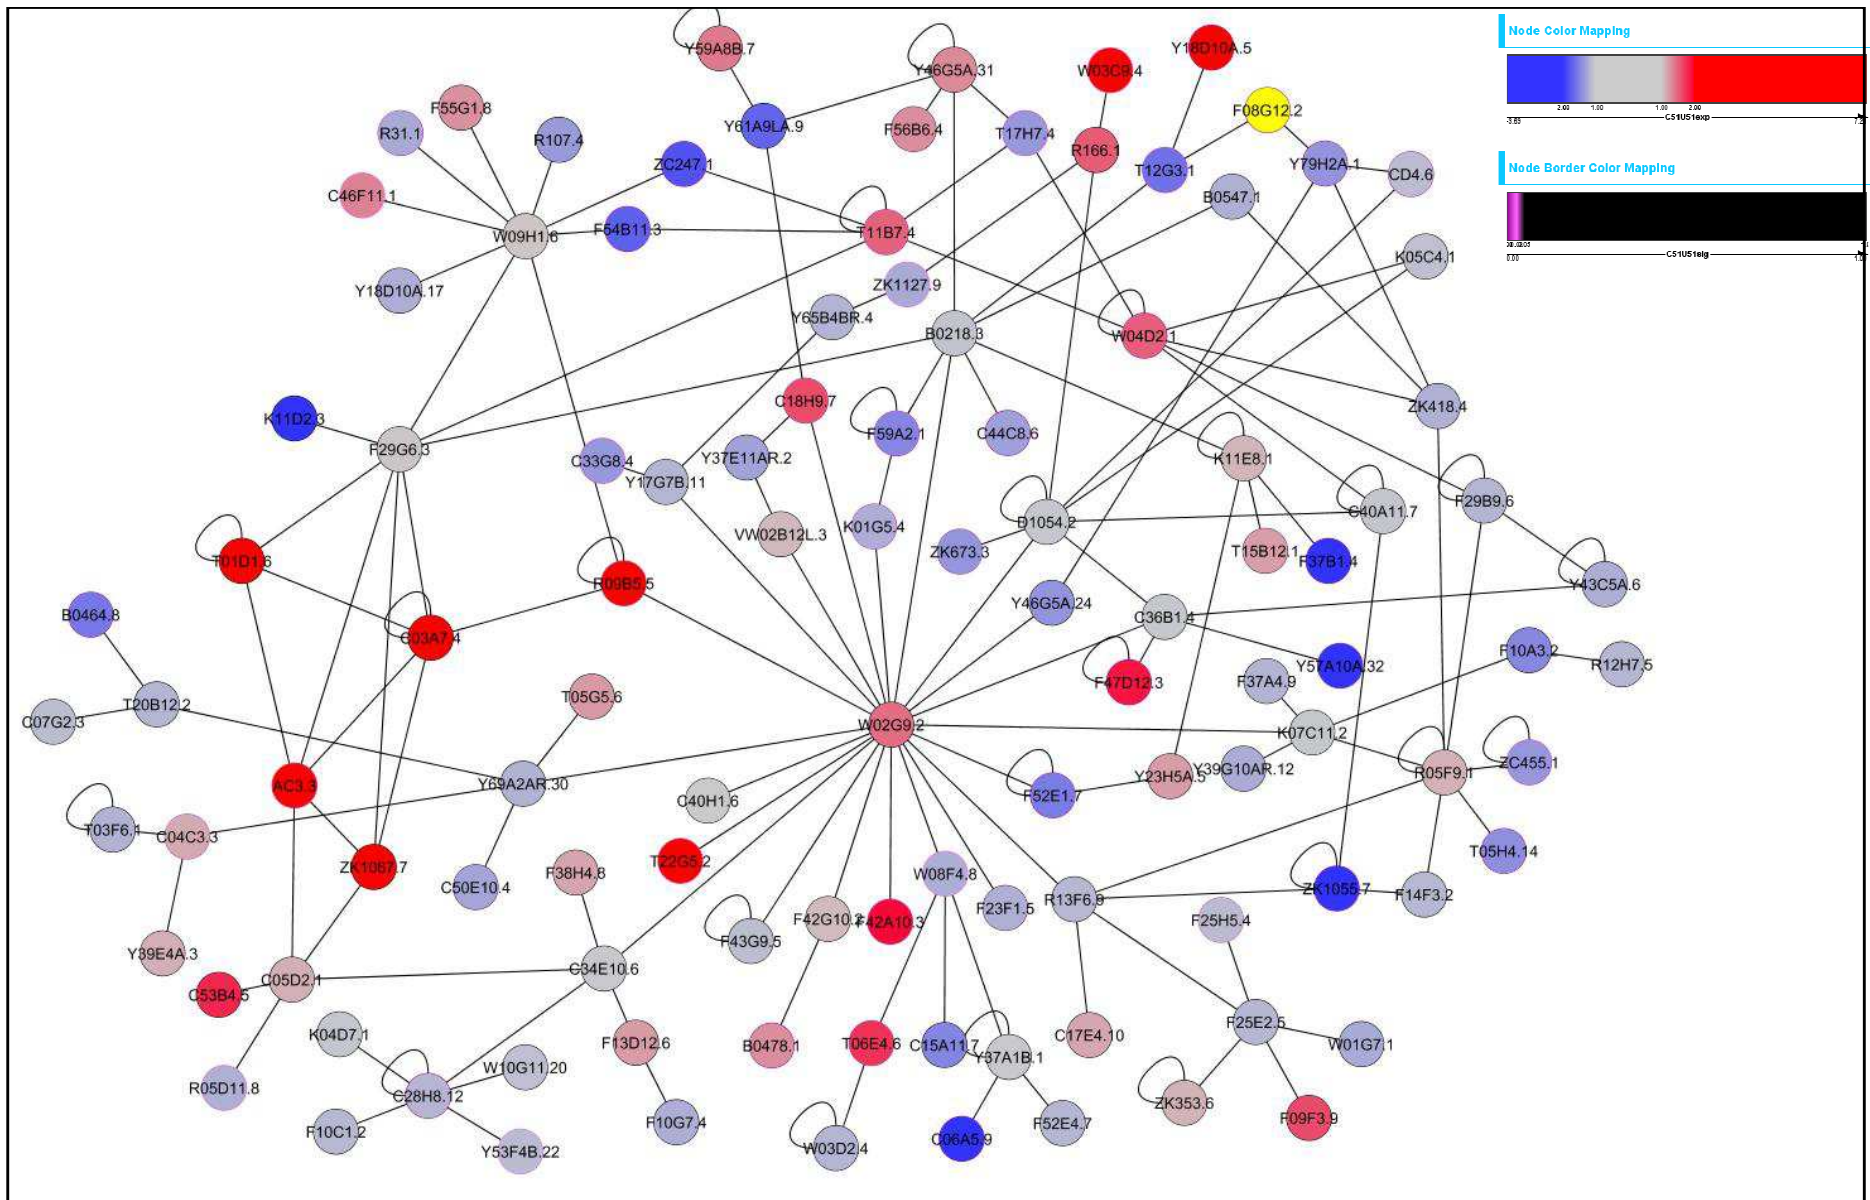

Additional Figure 4. At 3 h, the combination treatment led to additional effects compared to EtBr alone. Development is the most-altered gene ontology; differences were also observed in transcription, protein catabolism, and organellar organization. Blue indicates higher expression in the combination than in EtBr alone.

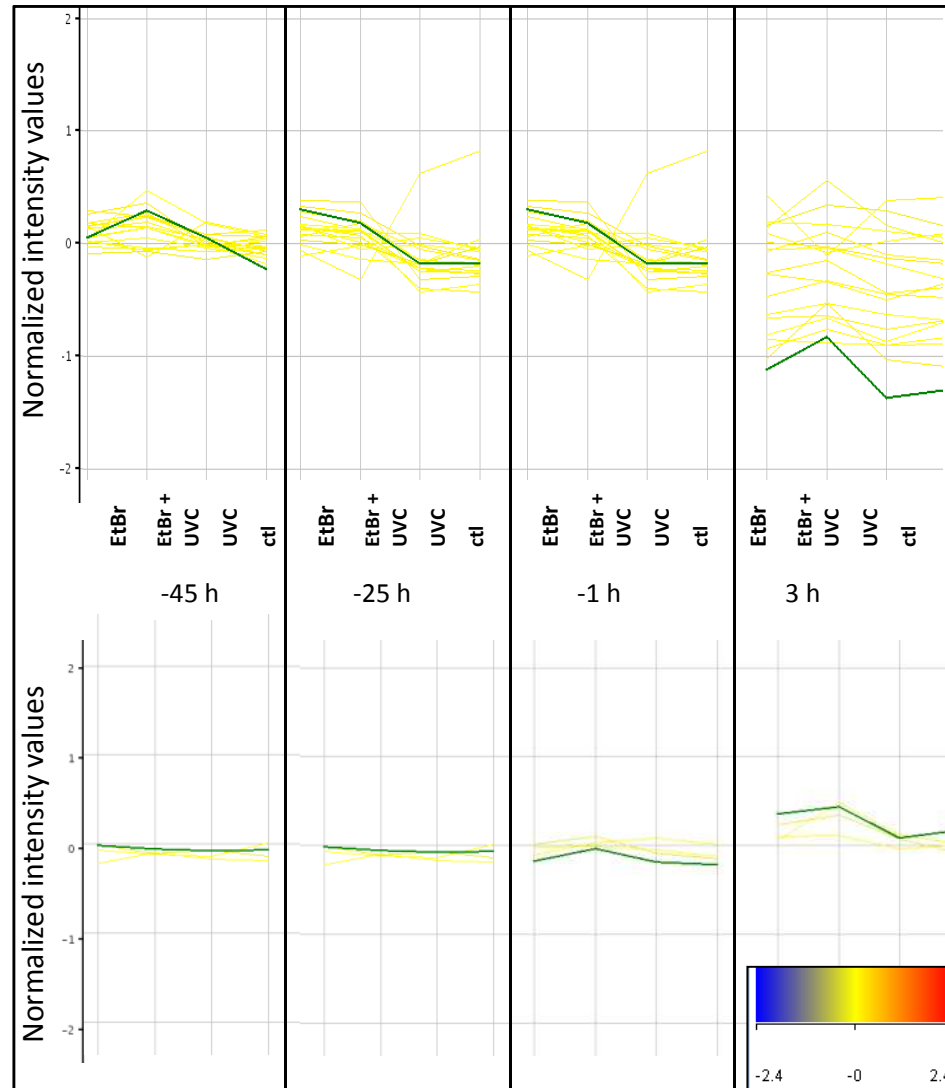

Additional Figure 5. Some autophagy genes were induced by EtBr and UVC at later timepoints (top panel; *lgg-2* highlighted). No changes were observed in fusion or fission genes (bottom panel; *eat-3* highlighted). Red-blue scale coloration is based on comparison to mRNA levels in control samples at -45 h. Normalized intensity values are on a binary log scale (i.e. “1” indicates a 2-fold change, “2” a 4-fold change, etc.). n = 4-6.

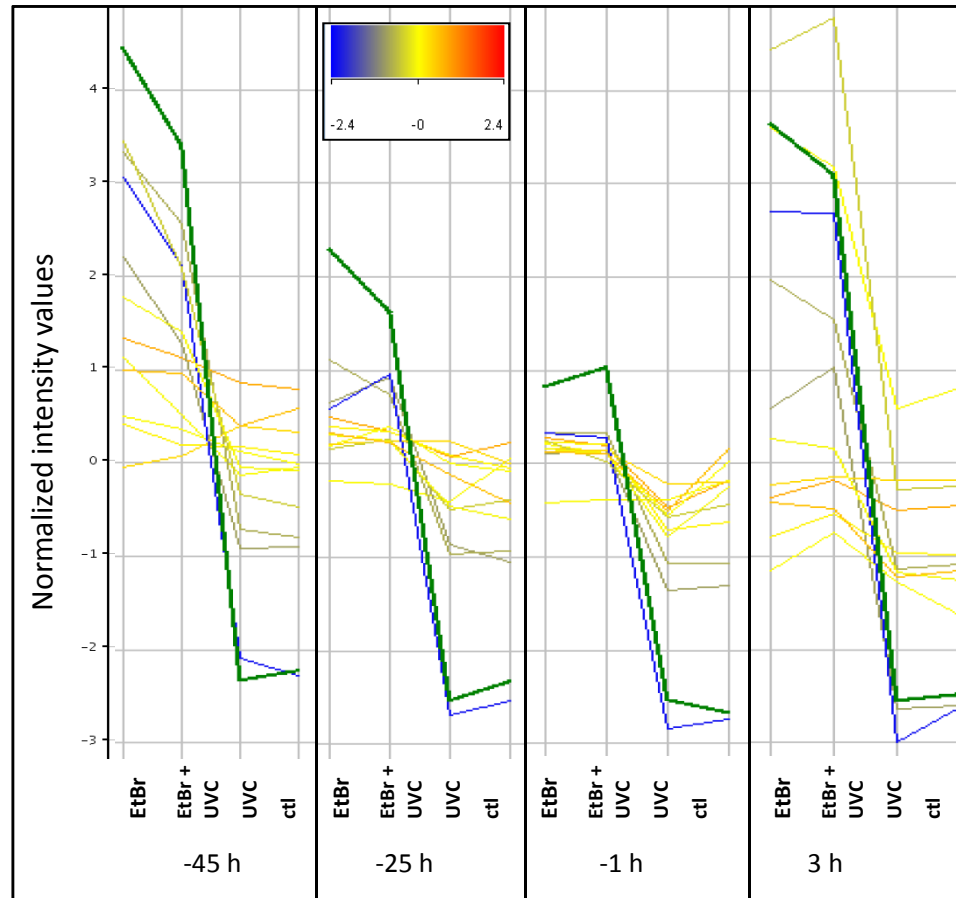

Additional Figure 6. Many cytochrome P450 genes were upregulated by exposure to ethidium bromide; shown are genes upregulated by EtBr and fitting the GO term "monooxygenase activity." The genes shown are *cyp-35B3* (highlighted in green), *cyp-13A7*, *cyp-35A5*, *cyp-35B1*, *cyp-33C3*, *cyp-33C6*, *cyp-33C7*, *cyp-33D3*, *cyp-35B2*, *cyp-35A1*, *cyp-33C5*, and *cyp-33C4*. Red-blue scale coloration is based on comparison to mRNA levels in control samples at -45 h. Normalized intensity values are on a binary log scale (i.e. "1" indicates a 2-fold change, "2" a 4-fold change, etc.). n = 4-6.

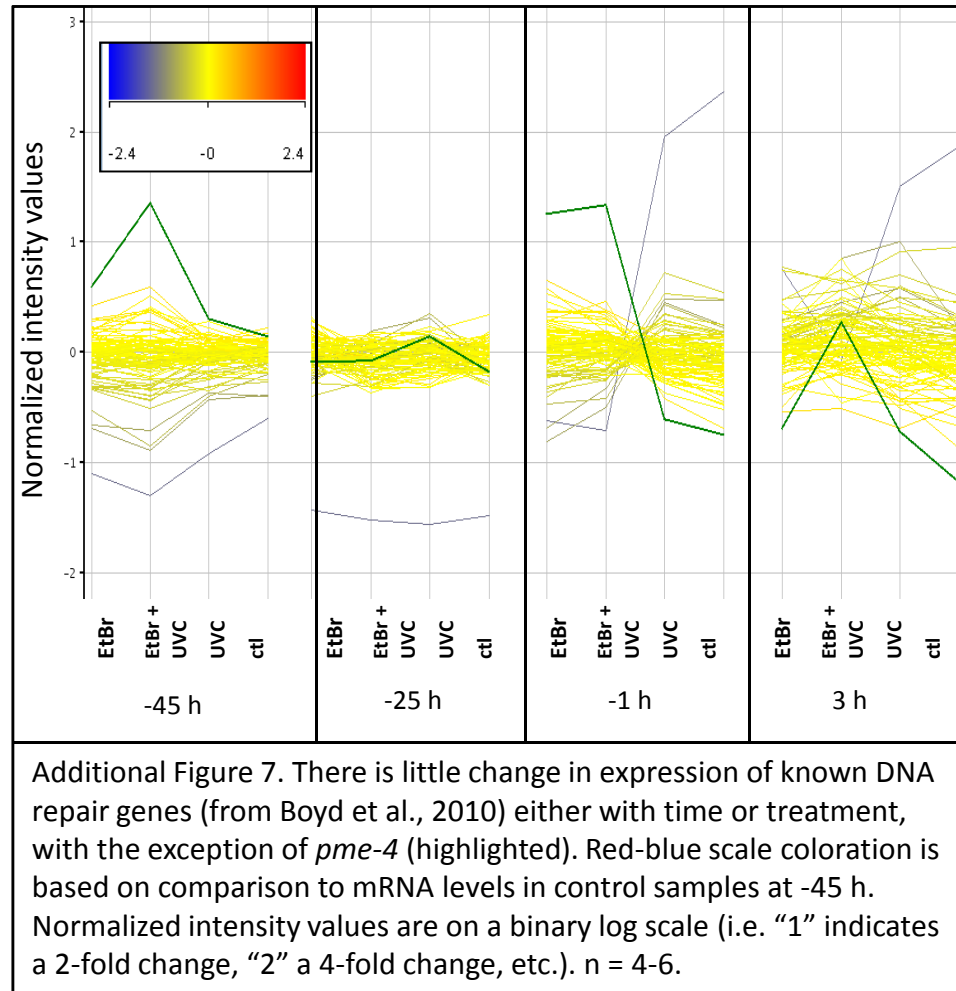

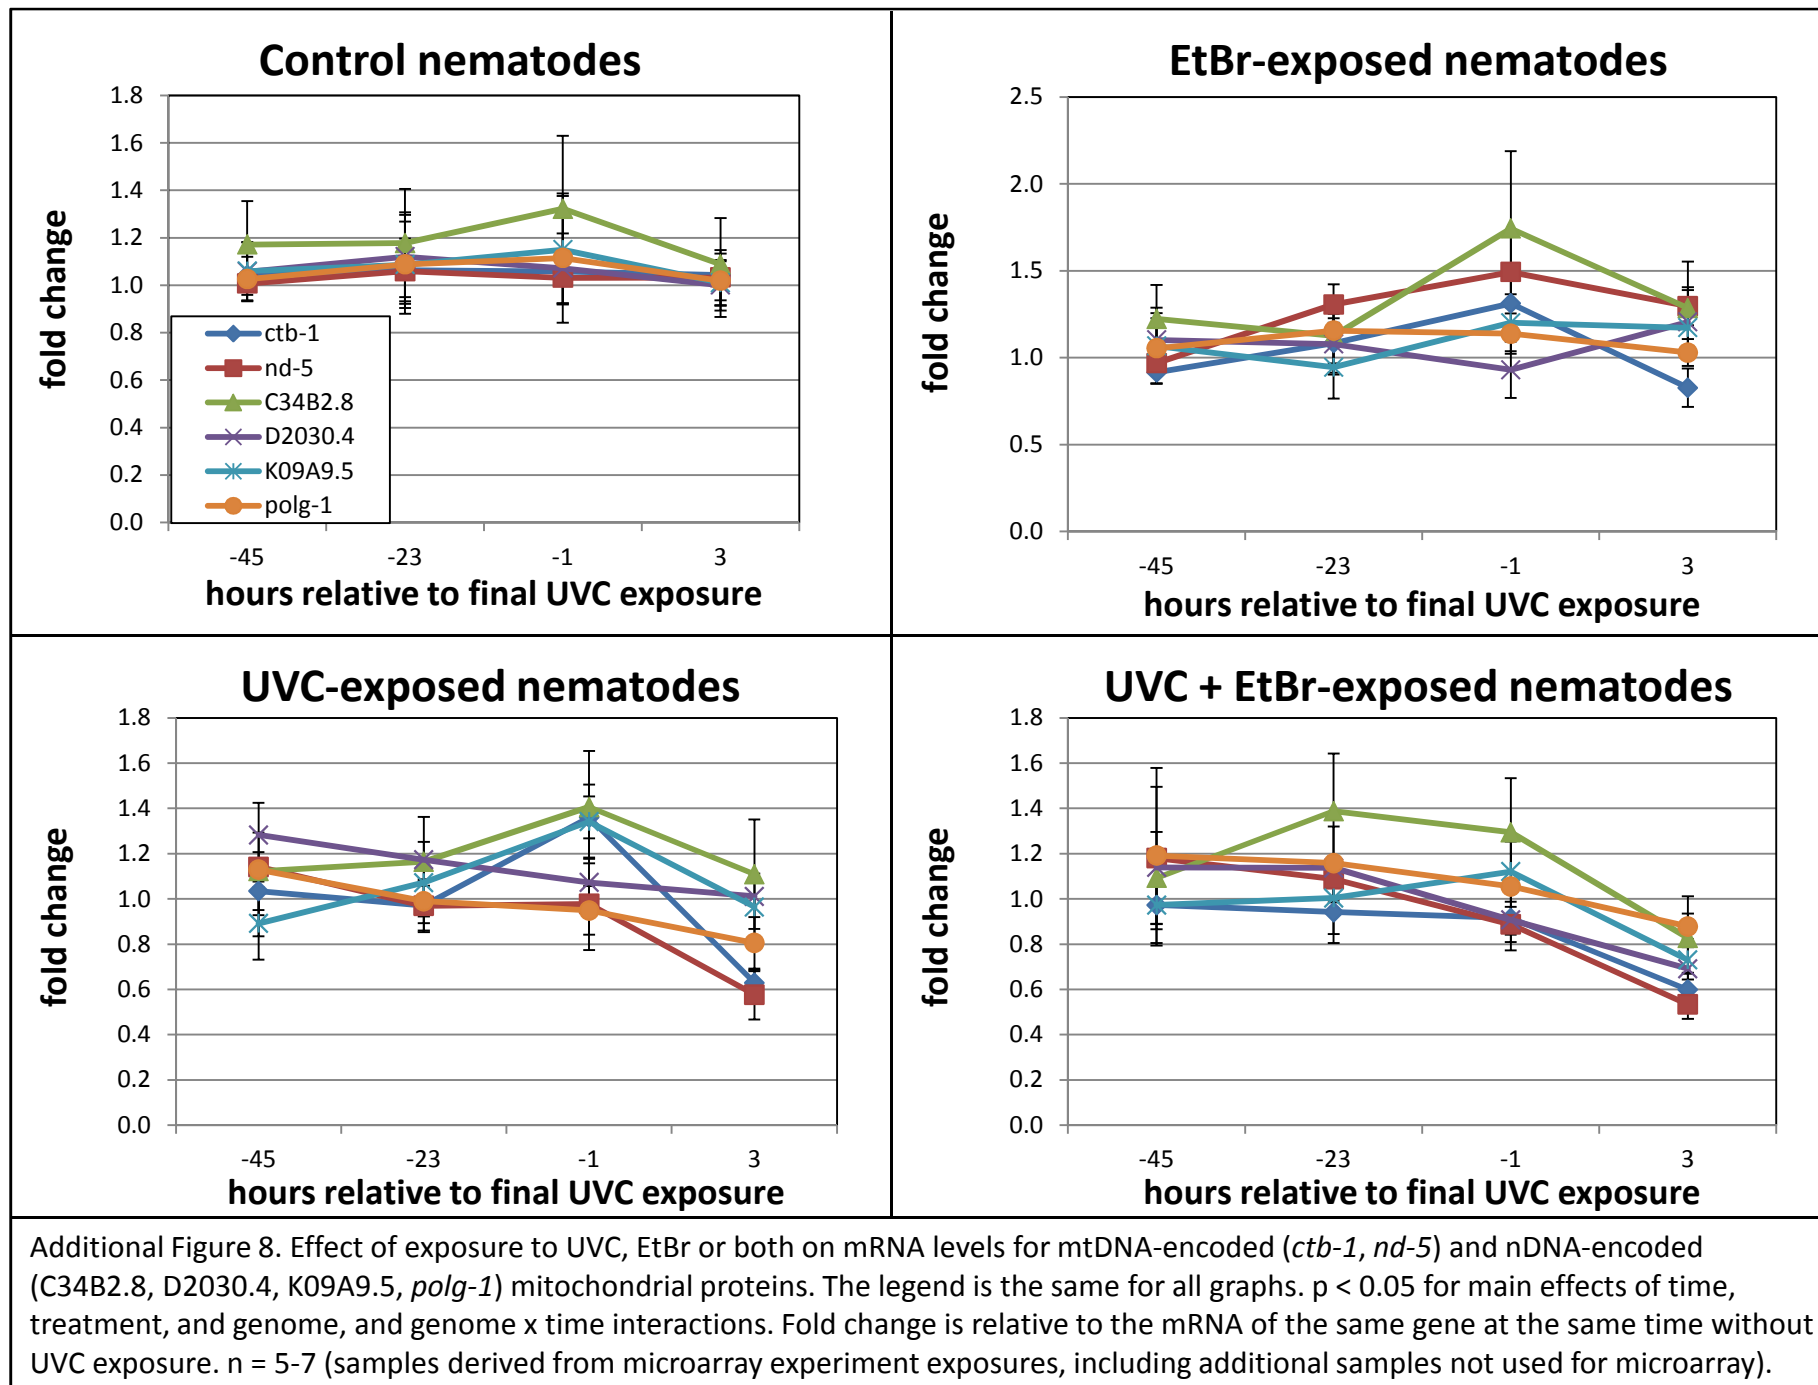



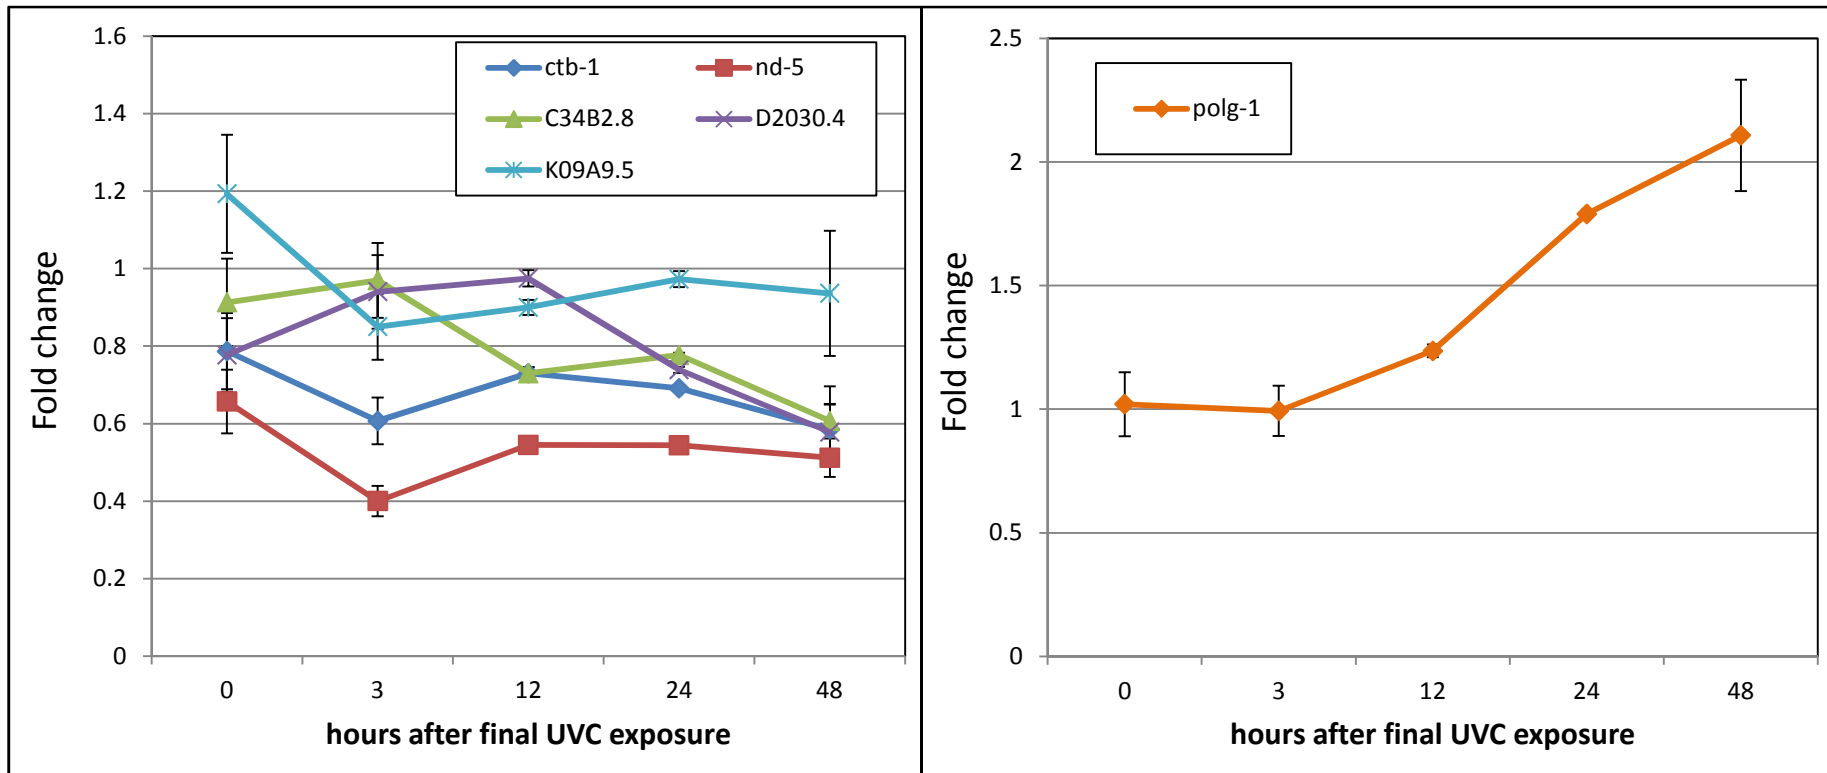

Additional Figure 9. Effects of exposure to UVC in the PE255 strain. *polg-1* is graphed separately for consistency with Fig. 6. *ctb-1* and *nd-5* are mtDNA-encoded, and C34B2.8, D2030.4, K09A9.5, *polg-1* are nDNA-encoded, mitochondrial proteins. The effect of UVC and gene ( $p = 0.016$  and  $p < 0.0001$  respectively) were significant, as was the interaction of UVC with gene ( $p = 0.003$ ). No other main or interactive effects were significant ( $p > 0.05$ , 3 factor ANOVA). Comparisons at specific times could not be made due to the lack of significant interactions involving time. Gene-by-gene comparisons (across time) by FPLSD indicated that *polg-1* behaved differently than all other genes ( $p \leq 0.003$ ), and *nd-5* was distinct from K09A9.5 ( $p = 0.02$ ). Fold change is relative to the mRNA of the same gene at the same time without UVC exposure.  $n = 3-6$ .
